# Diffuse optical tomography system for acute traumatic brain injury in the intensive care unit: a prospective study on healthy volunteers

Mario Forcione,<sup>a, b,\*</sup> Antonio Maria Chiarelli,<sup>c</sup> David Perpetuini,<sup>c</sup> Guy A. Perkins,<sup>d</sup> Andrew R. Stevens,<sup>a, e</sup> David J. Davies<sup>a, e</sup> Antonio Belli<sup>a, e</sup>

<sup>a</sup> University of Birmingham, Neuroscience & Ophthalmology Research Group, Institute of Inflammation & Ageing, College of Medical and Dental Sciences, Edgbaston, Birmingham, UK, B15 2TT

<sup>b</sup> University of Milan-Bicocca, School Medicine and Surgery, Piazza dell'Ateneo Nuovo, Milan, Italy, 20126

<sup>c</sup> University 'G. D'Annunzio' of Chieti-Pescara, Institute for Advanced Biomedical Technologies (I.T.A.B.) and Department of Neuroscience, Imaging, and Clinical Sciences, Via Luigi Polacchi 13, Chieti, Italy, 66100

<sup>d</sup> University of Birmingham, School of Computer Science, College of Engineering and Physical Sciences, Edgbaston, Birmingham, UK, B15 2TT

<sup>e</sup> University Hospitals Birmingham NHS Foundation Trust, Neurosurgery Department, Mindelsohn Way, Birmingham, UK, B15 2GW

## Abstract

**Significance:** Current systems for diffuse optical tomography (DOT) are unsuitable for clinical applications on acute traumatic brain injury (TBI) patients while in the intensive care unit (ICU).

**Aim:** To develop and test a method for DOT recordings suitable for TBI patients in the ICU. This method is based on measurements and co-registration using 3-D optical scans, and the acquisition of optical data using a custom-made helmet which would enable a multimodal (invasive and non-invasive) neuromonitoring.

**Approach:** Probe displacements compared to electromagnetic digitization co-registrations were assessed. The capacity to isolate and monitor, using functional near-infrared spectroscopy (fNIRS), the optical signal in the intracranial (ICT) and extracranial tissues (ECT) was tested on 23 healthy volunteers. Participants were scanned with a frequency-domain NIRS device (690 and 830 nm) during 5 Valsalva maneuvers (VM) in a simulated ICU environment.

**Results:** The results showed an average error in probe displacement of 5.5 mm, a sufficient capacity to isolate oxyhemoglobin O<sub>2</sub>Hb ( $p=6.4 \cdot 10^{-6}$ ) and total hemoglobin HbT ( $p=2.8 \cdot 10^{-5}$ ) in the ICT from the ECT, and to follow the changes of hemoglobin in the ICT during the VM (O<sub>2</sub>Hb,  $p=9.2 \cdot 10^{-4}$ ; HbT,  $p=1.0 \cdot 10^{-3}$ ).

**Conclusions:** The developed approach appears to be suitable for use on TBI patients in the ICU.

**Keywords:** diffuse optical tomography, functional near-infrared spectroscopy, Valsalva maneuver, traumatic brain injury, intensive care unit.

\*Mario Forcione, E-mail: [m.forcione@campus.unimib.it](mailto:m.forcione@campus.unimib.it)

## 1 Introduction

Traumatic brain injury (TBI) is a leading cause of injury-related death and disability, resulting in an estimated one million deaths per year and shortened life expectancy for survivors by an average of six years (1). Currently, there is no disease-modifying treatment for the primary injury sustained by the brain during trauma, and the treatment for severe TBI remains limited to the prevention of subsequent insults (e.g., intracranial hypertension, ischemia), known as secondary brain injury.

41 Pivotal components of established treatment strategies in TBI patients are continuous  
42 neuromonitoring and adaptation of the physiological parameters accordingly to maintain intra-  
43 cranial homeostasis.

44 Functional near-infrared spectroscopy (fNIRS) represents a non-invasive, continuous  
45 neuromonitoring tool for tracking changes in brain oxygenation in severe TBI patients by  
46 measuring changes of oxyhemoglobin (O<sub>2</sub>Hb) and deoxyhemoglobin (HHb) concentrations (2-4).

47 Contrast-enhanced NIRS can also be employed to detect changes in optical density during a dye  
48 passage (e.g., indocyanine green [ICG]), allowing one to assess cerebral perfusion and blood-brain  
49 barrier (BBB) damage (5-7). So far, commercially available NIRS devices (e.g., INVOS 5100

50 Cerebral Oximeter; ISS Oxiplex TS) have not shown sufficient ability to detect episodes of  
51 ischemia in cases of severe TBI compared to the invasive intracranial techniques (e.g., brain partial  
52 oxygen pressure [PbtO<sub>2</sub>]) (8-10). However, the validity of a direct comparison between (i) the level

53 of cerebral tissue saturation and its fluctuations measured by the optical device, and (ii) the  
54 absolute values and their changes measured by the PbtO<sub>2</sub> monitor, can be impaired by the complex  
55 pathogenesis of brain trauma (11). In contrast, the addition of fNIRS and contrast-enhanced NIRS

56 to currently used neuromonitoring techniques, including PbtO<sub>2</sub>, could potentially lead to a more  
57 precise assessment of the tissue status (5, 11). Thereby, the drive for "non-invasive equivalence"  
58 to PbtO<sub>2</sub> should be dropped, and instead the hitherto untested abilities of the optical technique,

59 when included in a multimodal monitoring regime, to stratify injury severity and aid clinical  
60 decision-making, could finally be explored.

61 Diffuse optical tomography (DOT) is an extension of NIRS imaging that uses a distributed high-  
62 density array of NIRS probes to spatially map tissue optical properties on a co-registered structural  
63 image (e.g., computerized tomography [CT], magnetic resonance imaging [MRI]) (12, 13).

64 Compared to commercially available NIRS devices, DOT offers several advantages in the TBI  
65 monitoring by addressing the anatomical complexity of the TBI lesions (11). This advantage  
66 suggests that the commercially available NIRS devices used in clinical trials to date have not fully  
67 explored the capabilities of optical techniques and that DOT should be tested instead. Whereas  
68 DOT has been successfully demonstrated as a neuromonitoring technique in infants admitted to  
69 the neonatal intensive care unit (ICU), the authors are not aware of any studies which have  
70 performed DOT measurements on adult severe TBI patients in the ICU (14). One of the difficulties  
71 in performing such studies is related to the clinical environment in which the optical data should  
72 be acquired (e.g., contamination of the signal from the ambient light, lack of space at the patient's  
73 bedside, presence of an intracranial bolt for intracranial pressure [ICP] neuromonitoring).  
74 Furthermore, the standard processes of probe digitization using an electromagnetic digitizer, or of  
75 adding skin markers to the subject's structural imaging, would be impractical solutions to  
76 implement DOT in the clinical practice of brain trauma care (15-17): the electromagnetic signal  
77 used by common digitizers can be impaired by the presence of metal at patients' bedsides; the  
78 optical analysis can only be performed *after* skin markers have been added. Since a CT scan is one  
79 of the first neuroimaging assessments made on TBI patients upon hospital admission, it is usually  
80 performed urgently (18). This makes it unlikely that skin markers could be positioned on TBI  
81 patients, at the locations where the optodes will be placed, prior to their first scan. Furthermore, it  
82 should be taken into consideration that the CT scan is crucial to the clinical decision process, and  
83 the presence of skin markers may increase the risk of imaging artefacts which can impair accurate  
84 radiological assessment. Therefore, a method that co-registers the optical data into a CT scan  
85 without the aid of skin markers, or electromagnetic digitization, is needed to make DOT analysis  
86 on TBI patients possible from the point of admission.

87 We devised a system to perform DOT recordings on acute TBI patients from the point of admission  
88 into ICU, comprised of a custom-made helmet for optical data acquisition in a multimodal  
89 neuromonitoring (e.g., intracranial probes), and a co-registration of the optical data on patients'  
90 structural images acquired for clinical assessment (e.g., CT scans). On healthy volunteers, we  
91 tested: (i) the accuracy of the novel co-registration compared to one based on electromagnetic  
92 digitization; and (ii) the capacity to accurately detect changes in levels of Hb in the ICT and  
93 separate signals from ICT and ECT, during VM.

## 94 **2 Materials and Methods**

### 95 *2.1 Participants*

96 23 healthy volunteers (17 males, ages ranging between 20 and 42 years old with a mean of 28  
97 years) were recruited into the RECOS study (Repetitive Concussion in Sport) (IRAS ID: 216703;  
98 Ref. REC: 17/EE/0275) performed at Centre for Human Brain Health, University of Birmingham,  
99 UK. They had different hair colours and hair densities.

100 Participants took part in this study after providing their written, informed consent. The study was  
101 conformed to the Declaration of Helsinki and was approved by the East of England-Essex  
102 Research Ethics Committee on 22 September 2017.

### 103 *2.2 Equipment*

#### 104 *2.2.1 Optical helmet*

105 A custom-built optical helmet was adapted from the description of Tan et al. to make it suitable  
106 for optical recordings on TBI patients in the ICU (Figure 1) (19).

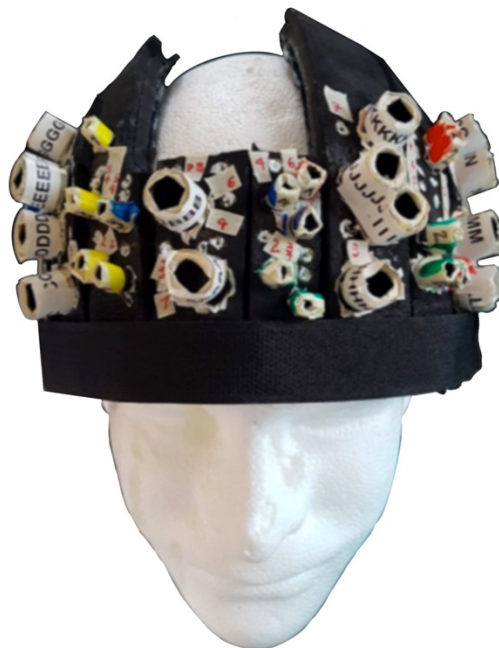

107  
108 **Figure 1. Picture of the helmet. The design features an open area at the top of the skull to avoid interference**  
109 **with invasive neuromonitoring devices.**

110 The helmet comprised multiple adjustable segments. It could be adjusted to fit a variety of head  
111 shapes and sizes, including post-surgery (e.g., decompressive craniectomies; external ventricular  
112 drains (EVD)). It was vital that the helmet design maintained patient comfort and safety (e.g., no  
113 increase in ICP), whilst also being rigid enough to keep the probes still during the recording. The  
114 helmet is designed to be affixed to the patient using disposable Velcro straps or medical bandages  
115 under the chin. To reduce the risk of infection and to grant access for intracranial monitoring and  
116 treatment, no slices were positioned in the vicinity of the Kocher's point, where the ICP bolt and  
117 the external ventricular drain (EVD) are usually positioned (18).

118 The helmet comprised multiple black layers. The thicker part was made of two layers of black  
119 foam (The Michaels Companies, Las Colinas, Irving, Texas, USA) to shield the probes from  
120 ambient light as well as to keep the helmet lightweight. These two layers were glued together while  
121 held in a curved shape, to model the helmet frame. The internal lining of the helmet was made of  
122 a thin layer of polyurethane rubber, RenCast (Freeman manufacturing and Supply Company,  
123 Avon, Ohio, USA), which came into contact with the scalp, along with the probes. Polyurethane

124 rubber has been used in previous studies on TBI patients in the ICU and, in our experience, it  
125 increases the helmet's integrity whilst also being suitable for clinical environments, as it is non-  
126 porous, soft and easy to clean (8, 20).

127 The layout for optical recording covered only the frontal lobes to facilitate the positioning of the  
128 probes on TBI patients who have limited head movement due to being unconscious in a supine  
129 position with their head being tilted-up, as per ICP control care, potentially wearing a hard cervical  
130 collar, and being intubated or with a tracheostomy (18) (Figure 2, A).

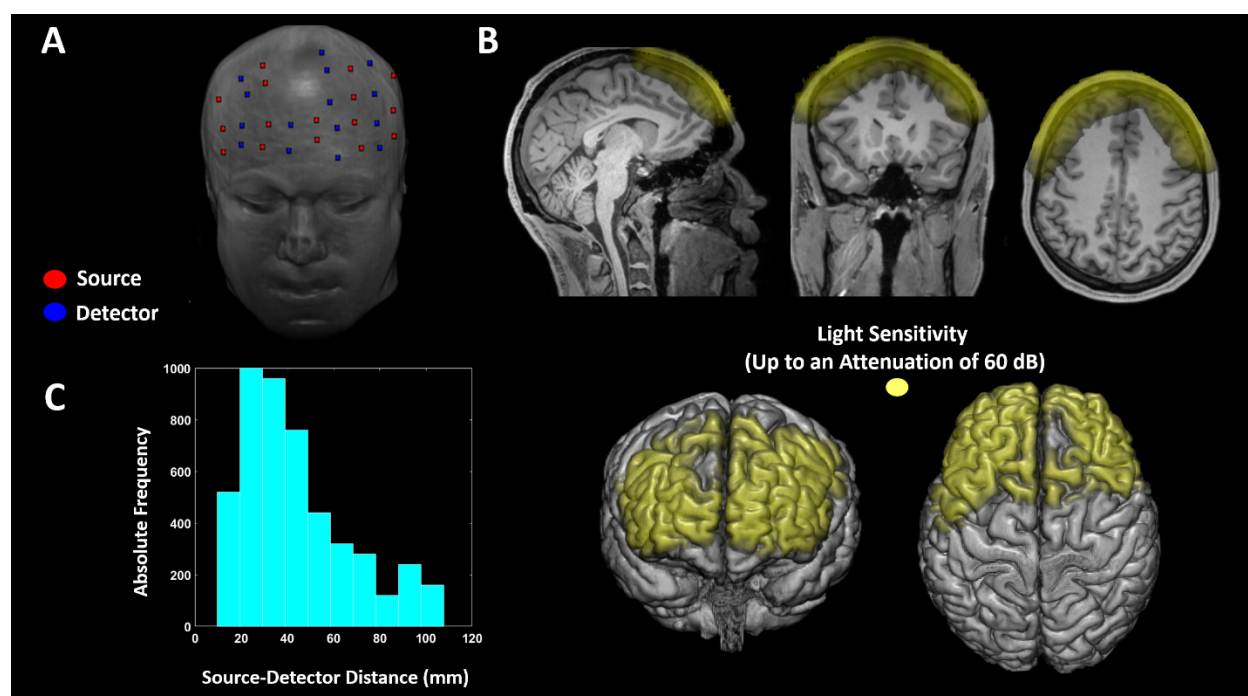

131  
132 **Figure 2. A: Illustration of the optical probes' positions on a structural MRI. The sources' positions are**  
133 **illustrated as red dots and the detectors' positions as blue dots. B: Average light sensitivity of the probe**  
134 **configuration used, computed with a FEM approach (21). The light sensitivity is displayed up to an**  
135 **attenuation of 60 dB (1000 times), and it is overlaid on an MRI of a representative participant. C: Absolute**  
136 **frequency of the SD distances of the channels across all subjects.**  
137 Before making holes to house the probes, a "3-space" FastTrak 3-D digitizer (Polhemus,  
138 Colchester, Vermont, USA) was used to electromagnetically digitize the helmet surface using the  
139 nasion and the external acoustic meatuses (EAM) of an artificial head as fiducial points. Based on  
140 the obtained digitization, a distribution of probes was selected to scan the broadest possible area  
141 with the maximal number of SD distances between 25 and 35 mm, so as to maximise sensitivity

142 to the ICT (12) (Figure 2, C). A custom-made MATLAB graphical user interface, near-infrared  
143 optode montage automated design (NOMAD) (<https://github.com/kylemath/nomad>), developed  
144 by Mathewson et al., was used to evaluate the acceptability of a plotted configuration of SD  
145 locations on the helmet, by ensuring the illumination of the frontal lobes of both hemispheres  
146 whilst avoiding cross-talk between SD pairs in a time-multiplexing cycle of light-emission (22).  
147 The average light sensitivity of the probe configuration used was computed with a FEM approach  
148 (Figure 2, B) (21). Below 60 mm distances, the probes were deemed to be usable for fNIRS-DOT  
149 analysis based on the data recorded during the VM. Holes to position the probes were punched  
150 only where the NOMAD analysis recommended. The limited number of holes, compared to the  
151 model described by Tan et al., was necessary to reduce the amount of ambient light that reaches  
152 the probes, by ensuring that no hole went unutilized, as well as to allow data recording in a supine  
153 position (19). The large diameter of the holes where the detectors were inserted allowed for the  
154 removal of any hair between the detector and the skin, in order to maximise photon harvesting  
155 from the scalp (23, 24). A plastic cone was inserted inside the hole along with each detector to  
156 mechanically secure them to the helmet, and to reduce the signal contamination by ambient light  
157 (24). The holes were labelled and color-coded to facilitate the positioning of the probes. Small  
158 white dots, that could be easily seen on an optical 3-D scanner, and whose small size still  
159 maintained a high level of pinpoint accuracy, were drawn on the helmet in the regions that were  
160 to be exposed in a supine participant.

## 161 *2.2.2 Data acquisition*

### 162 *2.2.2.1 Digitization*

163 Participants were scanned with an optical 3-D scanner (Artec Leo, Artec 3D, Luxembourg,  
164 European Union) while wearing the helmet and sitting on a chair. The quality of signal acquisition

165 was confirmed by a visual inspection on the 3-D scanner screen. On a 3-D image, the  $x$ - $y$ - $z$   
166 coordinates of the fiducials (i.e. nasion, EAM) and those of the white dots were measured using  
167 complementary software (Artec Scanner, Artec 3D, Luxemburg, European Union) (Figure 3, A).

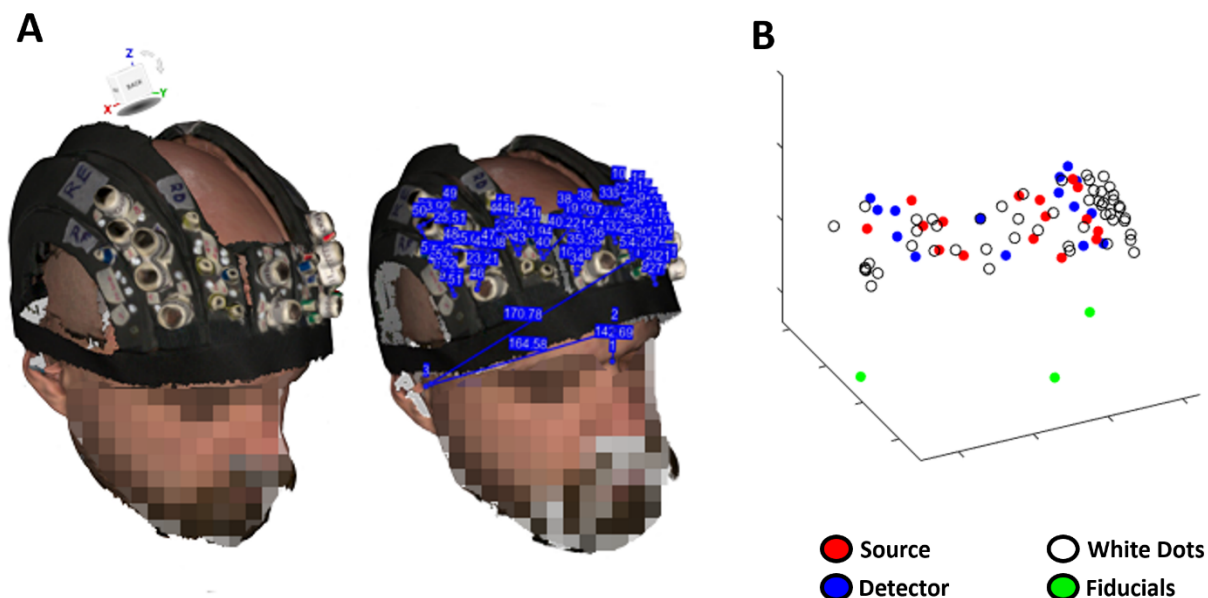

168  
169 **Figure 3 A: Picture from Artec Leo reconstructed using Artec Scanner and measurement of the 3-D**  
170 **coordinates of the nasion, EAM, and white dots. B: example electromagnetic digitization of fiducials (nasion**  
171 **and eam), white dots and optodes with FastTrak.**  
172 The fiducials, the holes for the probes, and the white dots were also digitized using the FastTrak  
173 3-D digitizer (Figure 3, B). The nasion and the EAM were chosen as fiducials because, according  
174 to our research experience, they can be identified relatively easily on an anatomical scan without  
175 the use of skin markers.

#### 176 2.2.2.2 *Optical recordings*

177 Optical data were recorded with a FD-NIRS system (Imagent; ISS Inc., Champaign, IL). Data were  
178 collected from 15 detectors, each measuring light emitted by eight of the 16 total source locations  
179 (120 dual-wavelength channels). Laser diodes delivered light, modulated at 110 MHz, for each  
180 source location at 690 and 830 nm wavelength (max power: 10 mW, mean power: 1 mW). The  
181 different diodes were switched on in a time-multiplexing manner. The light from the diodes was



182 transmitted to the scalp using thin optical fibres (diameter = 400  $\mu\text{m}$ ), whereas the back-scattered  
183 light from the head was collected using detector fibre bundles (diameter = 3 mm) connected to  
184 photomultiplier tubes (PMTs). Based on heterodyne detection, signal digitization, and fast Fourier  
185 Transform, the system generated temporal modulations in the emitted light DC (average), AC  
186 (amplitude), and phase. Optical data were sampled at 39.0625 Hz.

187 Coupling efficiency between the optodes and the skin, as well as signal noise, were monitored  
188 before the beginning of each scan using a complementary software (BOXY, ISS Inc., Champaign,  
189 IL) and adjustments were made to maximise the signal quality.

#### 190 2.2.2.3 *Valsalva manoeuvre*

191 The VM is a forced attempt to exhale against a closed glottis. The detailed knowledge of the  
192 expected hemodynamic changes during VM was used to validate the system presented, and so is  
193 described hereafter. Based on the changes in blood pressure, the VM can be divided into four  
194 phases (Figure 4) (25).

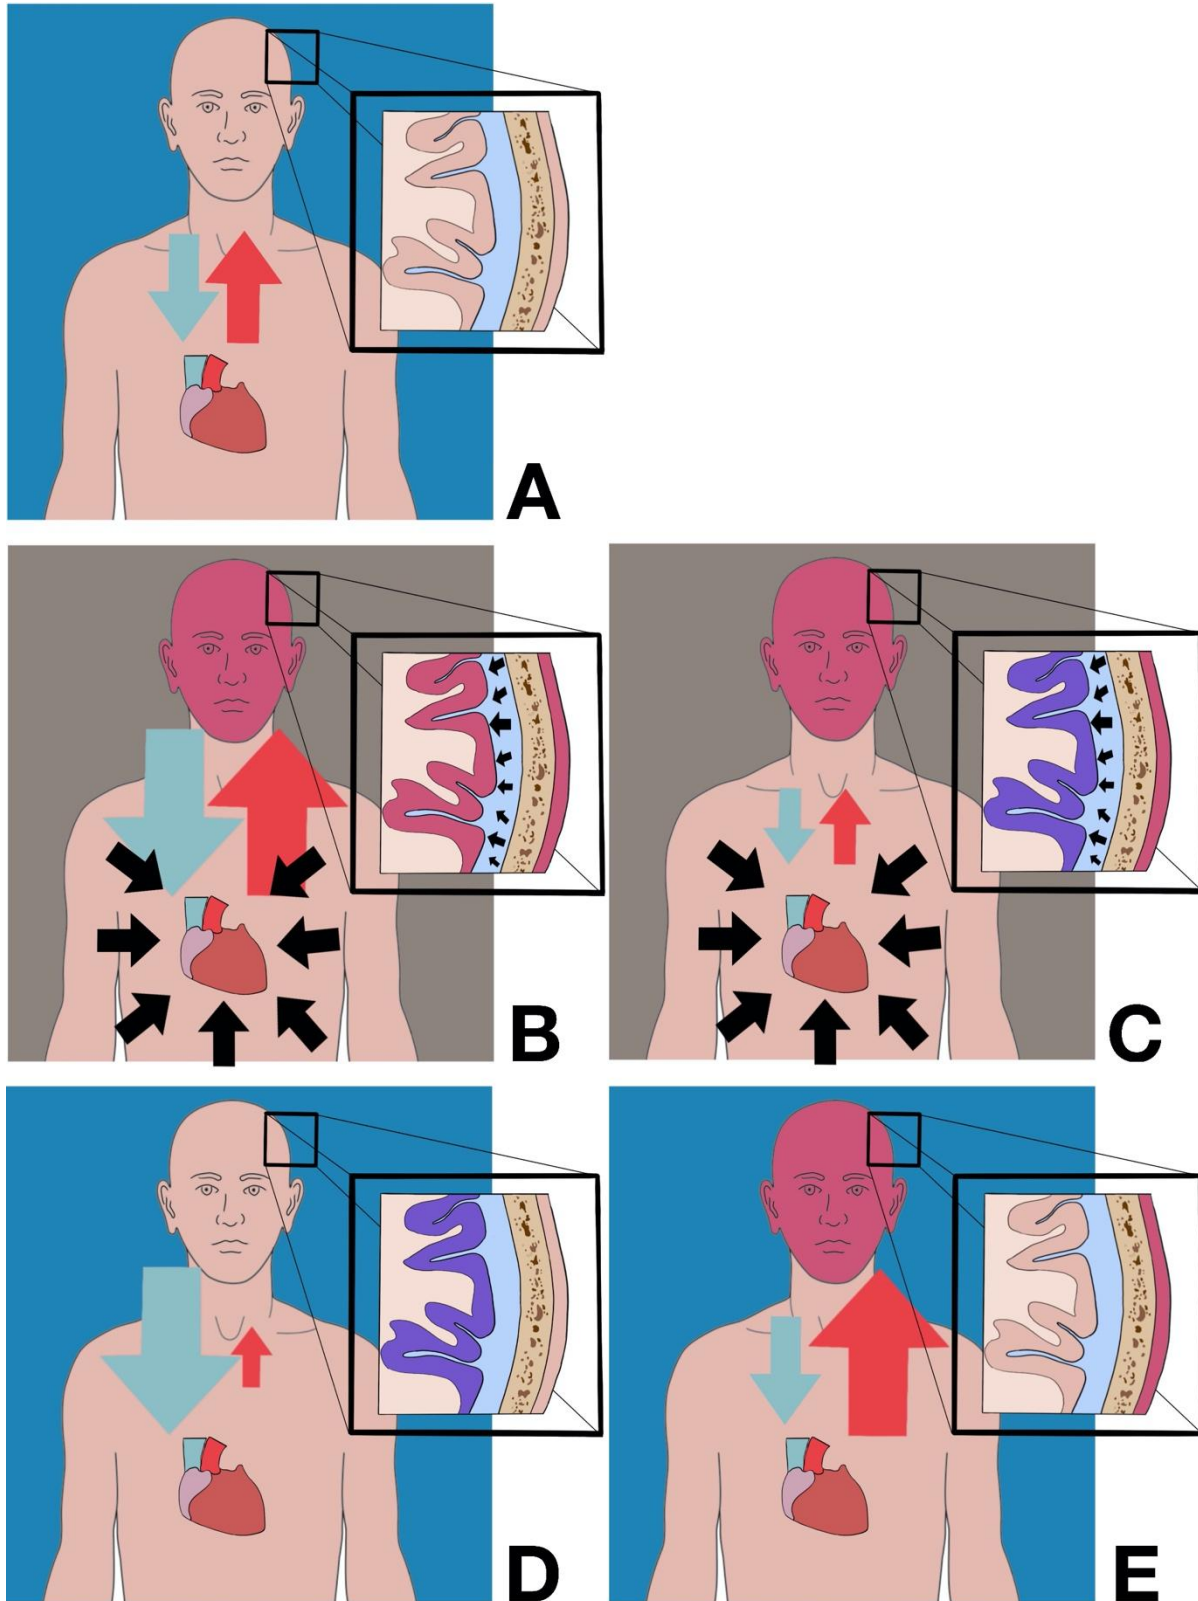

195  
196  
197  
198

**Figure 4. Representation of the physiological changes during the Valsalva manoeuvre's phases. The blue and grey backgrounds represent open and closed glottis, respectively. A: standard physiological state. B: Phase I. C: Phase II. D: Phase III. E: Phase IV.**

199 During phase I, lasting approximately 2 seconds, an increase of intrathoracic pressure, due to the  
200 forced exhalation attempt against the closed glottis, causes an increase of external pressure on the  
201 main vessels (e.g., aorta, superior vena cava) with consequent increase of the arterial and venous  
202 pressures (Figure 4 [B]) (25, 26). The increase of blood volume causes an increase in the levels of  
203 total hemoglobin (HbT) and tissue saturation in the ICT and ECT (Figure 4 [B]) (27). Due to the  
204 confinement of the brain into a non-expandable space, the increase of cerebral blood volume and  
205 the incapacity for it to drain because of the high intrathoracic pressure is immediately followed by  
206 a sharp rise in ICP (28-30). The high pressure exerted on the spinal compartment by the thorax is  
207 another contributing factor in the increase of ICP (30). This simultaneous rise in ICP serves as a  
208 protection mechanism for the brain and its blood vessels, which could otherwise be violently  
209 damaged by the sudden increase of arterial pressure (29, 30). During phase II, the reduction of  
210 end-diastolic volume, because of the reduction in venous return due to the high central venous  
211 pressure, leads to a decrease of arterial pressure and an increase of HR as a compensatory  
212 mechanism (Figure 4 [C]) (25). The reduction of blood supply, combined with the high brain  
213 metabolism, causes a progressive, non-compensated consumption of tissue O<sub>2</sub>Hb and a consequent  
214 gradual decrease of ICT saturation (Figure 4 [C]) (27, 31, 32). On the other hand, a similar  
215 reduction of tissue saturation is not present in the ECT due to its low level of metabolism (Figure  
216 4 [C]) (32). During phase III, the glottis is opened, and this is followed by a drop of intrathoracic  
217 pressure. The sudden lack of external pressure on the main vessels determines a high level of  
218 venous return and a rapid decrease of arterial blood pressure and ICP (25, 33) (Figure 4 [D]). It is  
219 worth noting that, at this stage, the level of arterial blood pressure is at its lowest point (33). The  
220 large pool of Hb is removed from the ECT by the venous return (Figure 4 [D]). In ICT, the already  
221 low tissue saturation further decreases due to the reduced arterial blood pressure (Figure 4 [D])

222 (27). In phase IV, there is a peak of arterial blood pressure and a subsequent increase of the O<sub>2</sub>Hb  
223 levels in the ECT and ICT (Figure 4 [E]) (25, 27).

224 The VM was considered a valid task to test the neuromonitoring assessment with fNIRS-DOT,  
225 due to the substantial and opposite changes of tissue saturation in ICT and ECT. These two  
226 different behaviours may give insight on the ability of the developed DOT approach to uncouple  
227 the contributions from the ICT and ECT, and so test the capacity of the optical technique to record  
228 the brain signal without interference from the ECT (34, 35). Furthermore, the VM simulates, on  
229 healthy human subjects, a common post-brain trauma scenario, characterised by a decrease of brain  
230 saturation and an increase of ICP (32, 36-39).

231 Participants were instructed to perform five VMs of 10 seconds each, preceded and followed by  
232 three minutes of rest. 10 seconds before each VM, participants were asked to prepare for the  
233 upcoming physical task taking long gasps as they were deemed suitable to generate intrathoracic  
234 pressure during the VM. Participants were in a semi-supine position with their heads slightly tilted  
235 by a cushion and in an illuminated environment. A clinician was observing the participants to  
236 reduce the effects of adverse events (e.g., syncope) and to ensure that the VMs were performed  
237 correctly. The VMs were monitored by measuring the expected HR increase using a pulse-  
238 oximeter, Fingertip (ChoiceMMed, Yuquan Road, Haidian District, Beijing, PR China), and by  
239 observing signs of physical effort (e.g., face redness, shakes for the strain, breath release at the end  
240 of the VM). Participants could stop the experiment at any stage.

### 241 *2.2.3 Data analysis*

#### 242 *2.2.3.1 Digitization*

243 The white dots from Artec Leo were co-registered on a structural image template through fiducial  
244 alignment based on least square fitting. The optode locations were co-registered by combining the

245 locations of the white dots and the fiducials according to Artec Leo, with the locations of the white  
246 dots and the optodes according to the FastTrak 3-D digitizer. This method was necessary to  
247 mitigate against the potential for inaccurate optode localisation and, in extreme cases, optode  
248 omission by Artec Leo, due to blurred images, large holder sizes (especially for the detectors), and  
249 the difficulty of ascertaining the probes' depth within the helmet. On the other hand, the digitizer  
250 is capable of measuring the coordinates of both the white dots and the optodes more reliably.  
251 The root mean square error (RMSE) between the Artec Leo image, using the method described  
252 above, and the FastTrak 3-D digitizer; and the number of white dots necessary to optimize this  
253 approach were investigated. Finally, the co-registration of the optodes on a template was used for  
254 the optical analysis.

#### 255 *2.2.3.2 Optical data analysis*

256 The optical DC intensity data were transformed into optical density (OD), movement corrected,  
257 and band-pass filtered between 0.01 and 0.5 Hz (zero-lag, 2<sup>nd</sup> order, Butterworth digital filter) (40,  
258 41). For each wavelength and channel, in addition to the ten seconds of the VM trial, single-trial  
259 OD was evaluated from 20 seconds prior up to 20 seconds after the VM onset. OD signal, of 50  
260 seconds duration, was randomly chosen during each rest period to obtain a control measurement.  
261 Average OD response for each wavelength, channel and subject was computed.

262 For each wavelength, only channels that provided a maximum average OD change below or equal  
263 to 0.05 (~5% signal change) were deemed as usable. On average,  $78 \pm 10$  and  $72 \pm 11$  channels for  
264 the 830 nm wavelength and the 690 nm wavelength, respectively, were used for further analysis.

265 Furthermore, a model of light propagation within head (forward model) and an inverse procedure  
266 were performed using a structural MRI (MPRAGE sequence) as a template. The FEM applied to  
267 the diffusion equation was used to estimate the forward model (42, 43). The FEM software  
268 NIRFAST was used to model light propagation through the head and to compute Jacobian

269 (sensitivity) matrices of DC light intensity to absorption changes induced by Hb oscillations (21,  
270 44). Figure 2 [B] reports an example of an average Jacobian (average optical sensitivity) for a  
271 participant overlaid onto the anatomical MRI template. The average Jacobian is displayed up to an  
272 attenuation of 60 dB (1000 times) from its maximum value. “Fine” meshes (maximum tetrahedral  
273 volume 2 mm<sup>3</sup>) were generated for FEM using the MATLAB software iso2mesh (45). The  
274 heterogeneous head models were based on the segmentation of the anatomical MRI. Segmentation  
275 of the skull and scalp, CSF, white matter, and grey matter was performed using Statistical  
276 Parametric Mapping (SPM) functions applied to the image (46, 47). Baseline optical properties  
277 ( $\mu_{\alpha}$ ,  $\mu'_{s}$  and  $\eta$ ) of the tissues at the relevant wavelength were taken from Tian et al. (48). An inverse  
278 procedure based on energy minimisation of the solution was used to convert intensity changes on  
279 individual channels to absorption changes in voxel space at each wavelength (44). The Lambert-  
280 Beer Law was inverted to evaluate O<sub>2</sub>Hb and HHb oscillations given absorption modulation at the  
281 two wavelengths employed. The extinction coefficients of the two forms of Hb at the 690 nm and  
282 830 nm wavelengths were extracted from Zijlstra et al. (49). Using the computed MRI  
283 segmentation, the MRI was separated into ICT and ECT compartments. The ICT compartment  
284 was evaluated by summing a smoothed version of white and grey matter segmentation. The ECT  
285 compartment was obtained by subtracting a binary image of the head with the previously defined  
286 ICT compartment. O<sub>2</sub>Hb and HHb signals were evaluated for each subject by averaging the Hb  
287 oscillations obtained in the different compartments, in a region where enough light sensitivity was  
288 obtained (-60 dB of attenuation, Figure 2 [A]). Across subjects’ average responses of O<sub>2</sub>Hb, HHb,  
289 and HbT (HbT= O<sub>2</sub>Hb +HHb) and associated statistics were evaluated.

## 290 3 Results

### 291 3.1 Co-registration

292 Figure 5 reports the RMSE between Artec Leo and FastTrak for the available white dots (51 in  
293 total), as a function of the number of white dots used for co-registration between the two  
294 modalities.

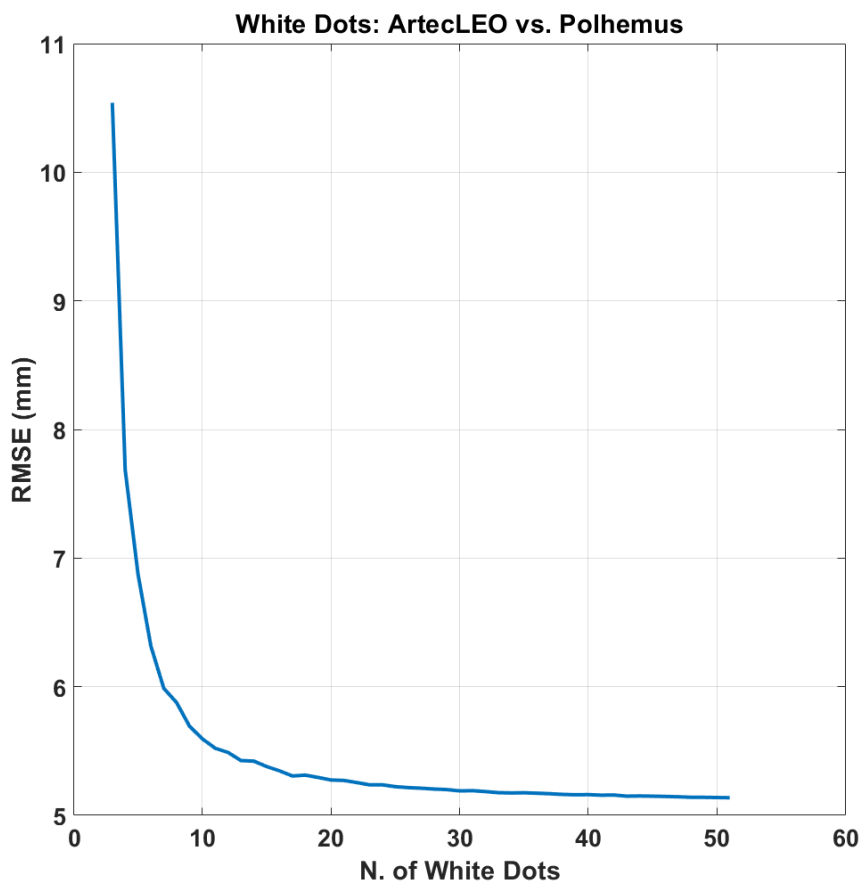

295  
296 **Figure 5:** RMSE between Artec Leo and FastTrak for the available white dots (51 in total), as a function of the number  
297 of white dots used for co-registration between the two modalities. The RMSE was computed using 10,000 iterations  
298 for each number of white dots selected, where the white dots used were randomly chosen.  
299 The RMSE reported in the figure was computed using 10,000 iterations for each number of white  
300 dots selected, where the white dots used for co-registration in each iteration were randomly chosen  
301 from all those available. The minimum number selected was 3. The plot in Figure 5 clearly shows

302 a plateau in the error between the two modalities with a number of white dots above ten. With this  
303 number of dots, the average distance between the corresponding locations is within 5.5 mm.

### 304 3.2 Optical data

305 Five VMs were performed per participant, resulting in a mean increase in HR of 17 bpm ( $\pm 11$ )  
306 ( $t=5.17$ ,  $df=21$ ,  $p=3.9 \cdot 10^{-5}$ ).

307 Figure [A] reports the ICT and ECT compartments that were probed by the optical array, overlaid  
308 onto the structural template image.

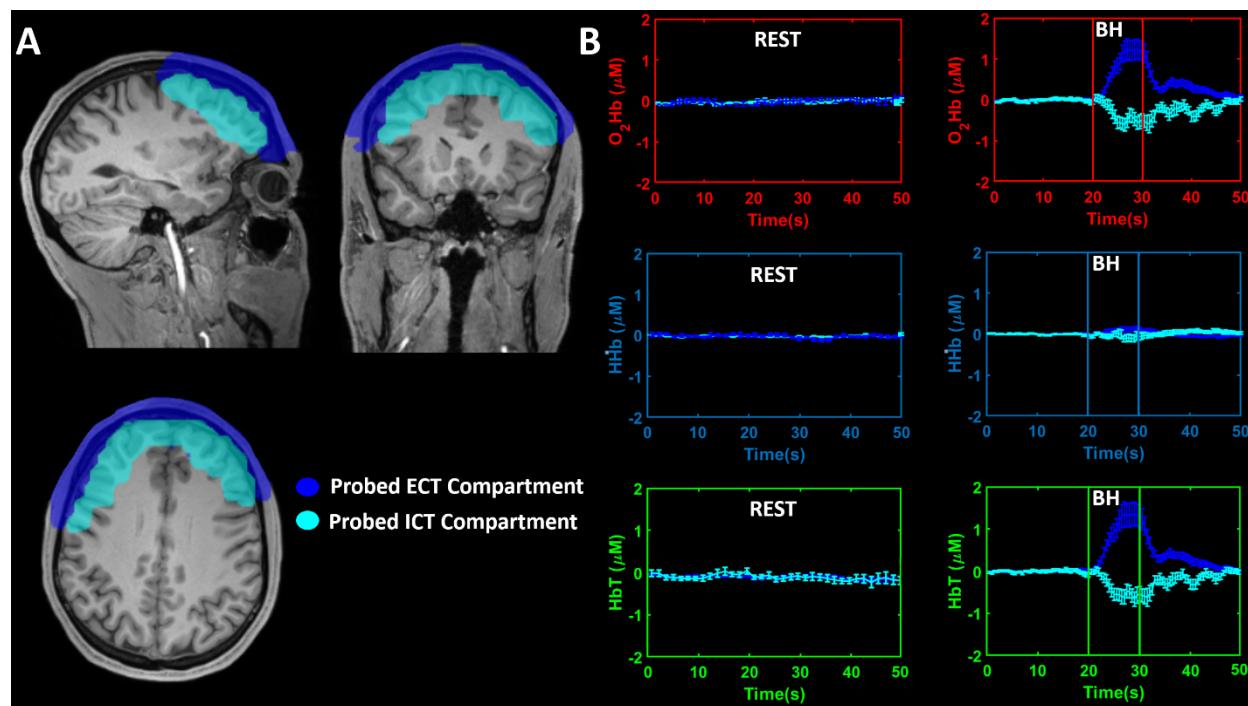

309  
310 **Figure 6. A: Computed ICT and ECT compartments that were probed by the optical array overlaid on the**  
311 **structural image. B: Across subjects' average modulations, and associated standard error, of O<sub>2</sub>Hb, HHb**  
312 **and HbT during the rest period and the VM in the two compartments. BH: breath-holding**  
313

314 The compartments were computed based on the structural MRI employing the algorithm described.

315 Figure [B] reports the across subjects' average modulations, and associated standard error, of  
316 O<sub>2</sub>Hb, HHb, and HbT during the rest period and the VM in the two compartments.



317 A clear difference in fluctuations of levels of Hb during rest and the VM is visible. Moreover,  
318 during the VM, decoupling in the Hb responses between the ICT and ECT compartments is  
319 evident.

320 In both these two layers, the changes of O<sub>2</sub>Hb, HHb, and HbT are in agreement with the expected  
321 changes of tissue saturation during different VM phases. In the first few seconds of the task, the  
322 levels of O<sub>2</sub>Hb and HbT began to increase in the ECT and decrease in the ICT. Subsequently, the  
323 levels of O<sub>2</sub>Hb and HbT in the ECT remained high and low in the ICT. At the time of the breath  
324 release (i.e. phase III), the levels of O<sub>2</sub>Hb and HbT sharply decreased in the ECT. A reduction in  
325 the ICT was less visible, probably because brain saturation was already compromised. In the  
326 following seconds (i.e. phase IV), there was a sharp increase of O<sub>2</sub>Hb and HbT in the ECT and  
327 ICT, with a slight time-delay between the two. Having completed the VM, the parameters of O<sub>2</sub>Hb  
328 and HbT in the ECT and ICT gradually returned to the values of the resting state. Notice that  
329 significant changes in O<sub>2</sub>Hb and HbT, coupled with a rather stable HHb, are consistent with  
330 modulations in the degree of perfusion of the tissue investigated, driven by changes in the pressure  
331 gradient between the head and the body at a constant tissue oxygen consumption. This is in  
332 agreement with previous studies on VM (50).

333 To test the statistical significance of the results, the peak changes in O<sub>2</sub>Hb, HHb, and HbT during  
334 the breath-holding (BH) phases of the VM (i.e., phases I and II) were extracted. A repeated-  
335 measures analysis of variance (rmANOVA) was performed considering two within-subject factors  
336 (i.e. Condition: Rest and VM; and Compartment: ICT and ECT). A significant effect was obtained  
337 when considering O<sub>2</sub>Hb for VM vs Rest ( $F=6.04$ ,  $df=1-21$ ,  $p=0.023$ ) and ICT vs. ECT ( $F=35.51$ ,  
338  $df=1-21$ ,  $p\sim 0$ ), and when considering HbT for VM vs Rest ( $F=7.28$ ,  $df=1-21$ ,  $p=0.014$ ) and ICT  
339 vs. ECT ( $F=28.19$ ,  $df=1-21$ ,  $p\sim 0$ ). Importantly a highly significant interaction between factors

340 was obtained, indicating a synergic effect between condition and compartment for O<sub>2</sub>Hb (F=35.56,  
341 df=1-21, p≈0) and HbT (F=28.42, df=1-21, p≈0). When performing a post-hoc analysis, a  
342 significant increase in O<sub>2</sub>Hb and HbT was found in the ECT when comparing VM to Rest (O<sub>2</sub>Hb:  
343 t=5.10, df=21, p=4.7·10<sup>-5</sup>; HbT: t=4.78, df=21, p=9.9·10<sup>-4</sup>) whereas a significant decrease in O<sub>2</sub>Hb  
344 and HbT was obtained in the ICT (O<sub>2</sub>Hb: t=-3.85, df=21, p=9.2·10<sup>-4</sup>; HbT: t=-3.74, df=21,  
345 p=1.0·10<sup>-3</sup>).

346 Moreover, when comparing the ECT and the ICT during the VM, a significant difference was  
347 obtained for both O<sub>2</sub>Hb (t=5.96, df=21, p=6.4·10<sup>-6</sup>) and HbT (t=5.32, df=21, p=2.8·10<sup>-5</sup>).

## 348 **4 Discussion**

### 349 *4.1 Co-registration*

350 The developed approach yielded an average displacement error, expressed as RMSE, of 5.5 mm  
351 (Figure 5), which importantly is well below the spatial resolution limit of DOT of ~15 mm (51).  
352 This means that the Artec Leo images, through the method presented here, can be applied to obtain  
353 an accurate co-registration of the optodes onto an anatomical template or a subject-specific  
354 anatomical image, with similar performance to electromagnetic digitization.

355 It is important to stress that the method reported here relies upon measured distances between the  
356 white dots and the optodes from a previously performed electromagnetic digitization. Hence, the  
357 developed approach for the co-registration of optical data on TBI patients in the ICU would require  
358 digitizing the white dots and the optical array on a phantom head or a healthy volunteer, with a  
359 head circumference similar to that of the subject that is going to be measured. Using a digitized  
360 helmet, the measurements performed on the TBI patient using an Artec Leo image would allow

361 clinicians to correctly locate the array onto the patient's CT scan or MRI, where the same fiducials  
362 can be selected.

363 Remarkably, this method can be performed without additional CT scans beyond the one performed  
364 upon admission for clinical assessment. The co-registration to the initial CT scan allows clinicians  
365 to prioritise the optical analysis of the most affected and clinically significant regions. The optical  
366 assessment of co-registered regions also allows clinicians to link the optical parameters and their  
367 functional evolution, to known lesions on the CT scans and their anatomical evolution. It should  
368 be mentioned that the ability to assess the optical properties of a brain lesion would depend on its  
369 size, so lesions smaller than the margin of error between the two co-registrations are likely to be  
370 overlooked, however, this problem is inherent to the limited spatial resolution of DOT (51). The  
371 decoupling of the commencement of DOT recordings from a targeted anatomical image would be  
372 useful either in the most severe cases of TBI, who for example can experience high ICP levels  
373 when supine or have in place extracorporeal systems (e.g., hemodialysis), all of which can be  
374 obstacles to performing further imaging, or in cases where clinicians are prioritising other patients  
375 and a second anatomical imaging may be postponed.

376 The degree of error between the two techniques may differ slightly from the 5.5 mm RMSE  
377 measured. The coordinates from Artec Leo can fail to exactly identify the digitized spots within  
378 the area of the white dots, so the absolute value of RMSE could be partially due to the testing  
379 analysis itself rather than the method implemented. However, this miscalculation can also affect  
380 the optical analysis, as the optode co-registration by Artec Leo is based on the measured distances  
381 between white dots and optodes by the electromagnetic digitization. The small sizes of the white  
382 dots mitigate, to a greater or less extent, this error. The holders' width, especially for the detectors,

383 can be another cause of inaccuracy in the optical analysis, because there could be a mismatch  
384 between the digitized spot within the holders and the real loci of the optodes.

385 Of note is that the analysis was performed on white dots that were uniformly distributed around  
386 the optode locations. Thus, it is essential for future helmets to maintain the uniformity of white  
387 dots in their design to accurately recover the optode locations on the anatomical image.

388 Although the results show a plateau of RMSE by using ten white dots, applications of this method  
389 on TBI for research purposes led us to think that helmets should possess as many white dots as can  
390 be fitted onto the exposed surface. This is because acquiring an optimal 3D image may not be  
391 always possible in hospital settings and blurred images may impair the retrieval of all the white  
392 dots. Moreover, the availability of white dots uniformly covering, not only the area around the  
393 optodes, but the whole head surface, may allow to employ more complex algorithms that may  
394 further reduce the optodes placement error (16, 17).

#### 395 *4.2 Optical Analysis*

396 The fluctuations of O<sub>2</sub>Hb, HHb, and HbT levels in the ICT due to the VM were separated in the  
397 analysis from those in the ECT. In both layers, the results conformed with the expected changes  
398 during the different phases of the VM. This consistency validates the optical system as being  
399 capable of monitoring changes in brain Hb concentration through fNIRS-DOT analysis.

400 A decrease of cerebral saturation during VM was also reported in studies that used NIRS devices  
401 (27, 32, 34, 52-54). However, these analyses were limited to measurement of the decrease of  
402 cerebral saturation, and the ECT signal plausibly contaminated them by an unknown value. On the  
403 contrary, the fNIRS-DOT analysis reported herein allowed for a comparison of the changes of  
404 levels of Hb in the ICT and ECT, providing a better understanding of how the detected optical  
405 signal relates to brain physiology. Similarly to other studies, we were unable to quantify the role

406 played by the ECT in the ICT signal, however the strong hemodynamic signal in the ICT leads us  
407 to think that no matter the extent of this contamination, it would be insufficient to obscure the  
408 tracking of the ICT signal during the VM (55). We believe that our test validated the aims of the  
409 study: (i) to test the ability of ICT monitoring, and (ii) to separate the ICT-ECT signals.  
410 These results are in agreement with a pilot study which was performed without the extensive use  
411 of short channels, leading us to think that the co-registration process implemented in both studies  
412 is a critical component in these optical results (56). This is in agreement with other studies that  
413 showed that co-registering the optical signal with a structural image could improve the imaging  
414 resolution and the localisation accuracy (57, 58). Furthermore, Clancy et al. specifically reported  
415 an improvement in the accuracy of the signal detected during VM in simulated studies, by co-  
416 registering the optical data with a structural image (59, 60). However, in a study on a healthy  
417 volunteer, the co-registration of the optical signal from a high-density patch into an atlas did not  
418 yield the same capacity to retrieve physiological changes of tissue saturation associated with the  
419 VM as in the simulations (61). This limited capacity in an *in vivo* analysis may be explained to  
420 some extent by a suboptimal co-registration process compared with the co-registration system  
421 presented herein. Furthermore, as mentioned in the introduction, the co-registration of the optical  
422 signal with a subject-specific image may be particularly significant for the assumption about the  
423 baseline optical parameters in TBI patients to be valid. Layer thicknesses and optical properties  
424 can vary significantly between individuals and across different areas of the head (62, 63). These  
425 differences can be even more significant in TBI patients due to brain lesions (e.g., ischemia,  
426 hemorrhage) or surgical interventions (e.g., decompressive craniectomy) (11). The co-registration  
427 of the optical analysis into a subject-specific image takes into account the individual anatomy of  
428 these layers and brain lesions.

429 *4.3 Limitations*

430 *4.3.1 Absence of arterial blood pressure monitoring*

431 Grading of the VM based on the changes in blood pressure was not possible. This may have  
432 affected the results as the quality of the performance of the VM may have differed across  
433 participants due to varying levels of commitment to the task and levels of cardiovascular fitness.  
434 Furthermore, it is not possible to perform the VM in the supine position at the same level as in the  
435 orthostatic one (26, 33). This further highlights the risk of different intensities of VM across  
436 participants if the VM is not performed with sufficient strength.

437 The lack of blood pressure monitoring also limited the separation of the different phases of the  
438 VM to an analysis of the expected changes of levels of Hb at different times without accurately  
439 correlating them to the blood pressure changes.

440 *4.3.2 Absence of subject-specific structural image*

441 An MRI template was used in place of the subject-specific structural image for the co-registration  
442 of the optical data. This reduced the accuracy of the fitting procedure of the probes on the  
443 participants' scalps due to their different head shapes. Moreover, the approximation also affected  
444 the optical data analysis, because the assumed optical properties of the different head layers were  
445 probably not anatomically identical among subjects (e.g., layer thickness).

446 *4.3.3 Global hemodynamic response during Valsalva manoeuvre*

447 The cerebral perfusion and tissue saturation in TBI patients can vary significantly across the brain,  
448 while the VM triggers a similar hemodynamic response across the whole brain (64, 65). Therefore,  
449 the ability to separate the different hemodynamic across the brain of TBI patients could not be  
450 determined from the results obtained.

451 *4.3.4 Limited field of view*

452 Although studies which investigated a broader coverage of the head using DOT have been  
453 presented for clinical applications in non-ICU scenarios (e.g., Parkinson syndrome), we limited  
454 the analysis to the frontal lobes to address the standard of care in ICU (44). In the future, new  
455 studies with a broader field of acquisition should be implemented, while maintaining the standard  
456 of care in acute TBI patients.

457 *4.3.5 Limited number of probes and wavelengths*

458 Our study was limited to 15 detectors and 16 sources at two wavelengths (690 and 830 nm) mainly  
459 designed to measure O<sub>2</sub>Hb and HHb levels. Future studies should apply HD (high density) DOT  
460 to further improve the optical accuracy, as well as using different wavelengths to make the  
461 recording more suitable for ICG measurement (6).

462 *4.3.6 Absence of phase-shift analysis*

463 Though a frequency-domain device was used, phase data were not implemented into the optical  
464 analysis. From results on simulated and phantom studies, analysis of the phase-shift can,  
465 theoretically, further increase imaging resolution and accuracy (66, 67). Future studies should  
466 explore this potentiality.

467 **5 Conclusions**

468 The results suggest that our method is capable of addressing the foreseeable problems associated  
469 with DOT neuromonitoring in TBI patients in the ICU. This procedure could enable fNIRS-DOT  
470 and contrast-enhanced DOT recordings as part of a multimodal monitoring on TBI patients upon  
471 hospital admission.

472 Future research should test other probe-position geometries up to HD-DOT, which may further  
473 increase the capability of the optical analysis to separate the signal from the different head layers  
474 and to monitor brain lesions. Clinical studies should be designed so that DOT measurements are  
475 included in a multimodal monitoring.

## 476 **6 Conflict of interest**

477 None to disclose.

## 478 **7 Code, Data, and Materials Availability**

479 Code and anonymized optical data are available in Matlab format in FigShare  
480 at <https://doi.org/10.6084/m9.figshare.25866682.v1>

## 481 **8 Acknowledgments**

482 This article presents independent research funded by the National Institute for Health Research  
483 Surgical Reconstruction and Microbiology Research Centre (NIHR SRMRC), partnership between  
484 University Hospitals Birmingham NHS Foundation Trust, the University of Birmingham, and the  
485 Royal Centre for Defence Medicine. The views expressed are those of the authors and not  
486 necessarily those of the NHS, the NIHR or the Department of Health.

487 Dr Mario Forcione thanks Mr Michael Orgill from Gill Learning (<https://www.gill-learning.co.uk>)  
488 for his academic advice and proof reading.

## 489 **9 References**

- 490 1. A. I. R. Maas et al., "Traumatic brain injury: integrated approaches to improve prevention,  
491 clinical care, and research," *Lancet Neurol* **16**(12), 987-1048 (2017).
- 492 2. D. J. Davies et al., "Near-Infrared Spectroscopy in the Monitoring of Adult Traumatic  
493 Brain Injury: A Review," *Journal of neurotrauma* **32**(13), 933-941 (2015).



- 494 3. M. S. Green, S. Sehgal, and R. Tariq, "Near-Infrared Spectroscopy: The New Must Have  
495 Tool in the Intensive Care Unit?," *Seminars in cardiothoracic and vascular anesthesia*  
496 **20**(3), 213-224 (2016).
- 497 4. I. K. Haitsma, and A. I. Maas, "Monitoring cerebral oxygenation in traumatic brain injury,"  
498 *Progress in brain research* **161**(207-216 (2007).
- 499 5. M. Forcione et al., "Cerebral perfusion and blood–brain barrier assessment in brain trauma  
500 using contrast-enhanced near-infrared spectroscopy with indocyanine green: A review,"  
501 *Journal of Cerebral Blood Flow & Metabolism* 0271678X20921973 (2020).
- 502 6. M. Forcione et al., "Dynamic contrast-enhanced near-infrared spectroscopy using  
503 indocyanine green on moderate and severe traumatic brain injury: a prospective  
504 observational study," *Quantitative Imaging in Medicine and Surgery* (2020).
- 505 7. M. Ganau et al., "Breakthrough in the assessment of cerebral perfusion and vascular  
506 permeability after brain trauma through the adoption of dynamic indocyanin green-  
507 enhanced near-infrared spectroscopy," *Quantitative Imaging in Medicine and Surgery*  
508 **10**(11), 2081-2084 (2020).
- 509 8. D. J. Davies et al., "Cerebral Oxygenation in Traumatic Brain Injury: Can a Non-Invasive  
510 Frequency Domain Near-Infrared Spectroscopy Device Detect Changes in Brain Tissue  
511 Oxygen Tension as Well as the Established Invasive Monitor?," *Journal of neurotrauma*  
512 **36**(7), 1175-1183 (2019).
- 513 9. S. R. Leal-Noval et al., "Invasive and noninvasive assessment of cerebral oxygenation in  
514 patients with severe traumatic brain injury," *Intensive Care Med* **36**(8), 1309-1317 (2010).
- 515 10. W. Weigl et al., "Application of optical methods in the monitoring of traumatic brain  
516 injury: A review," *J Cereb Blood Flow Metab* **36**(11), 1825-1843 (2016).
- 517 11. M. Forcione et al., "Mismatch between Tissue Partial Oxygen Pressure and Near-Infrared  
518 Spectroscopy Neuromonitoring of Tissue Respiration in Acute Brain Trauma: The  
519 Rationale for Implementing a Multimodal Monitoring Strategy," *International Journal of*  
520 *Molecular Sciences* **22**(3), 1122 (2021).
- 521 12. I. J. Bigio, and S. Fantini, *Quantitative Biomedical Optics: Theory, Methods, and*  
522 *Applications*, Cambridge University Press, Cambridge (2016).
- 523 13. M. D. Wheelock, J. P. Culver, and A. T. Eggebrecht, "High-density diffuse optical  
524 tomography for imaging human brain function," *Review of Scientific Instruments* **90**(5),  
525 051101 (2019).
- 526 14. T. Austin et al., "Three dimensional optical imaging of blood volume and oxygenation in  
527 the neonatal brain," *NeuroImage* **31**(4), 1426-1433 (2006).
- 528 15. G. Giacalone et al., "Time-domain near-infrared spectroscopy in acute ischemic stroke  
529 patients," *Neurophotonics* **6**(1), 015003 (2019).
- 530 16. C. Whalen et al., "Validation of a method for coregistering scalp recording locations with  
531 3D structural MR images," *Hum Brain Mapp* **29**(11), 1288-1301 (2008).
- 532 17. A. M. Chiarelli et al., "Comparison of procedures for co-registering scalp-recording  
533 locations to anatomical magnetic resonance images," *Journal of biomedical optics* **20**(1),  
534 016009 (2015).
- 535 18. E. E. Moore, D. V. Feliciano, and K. L. Mattox, *Trauma, Eighth Edition*, McGraw-Hill  
536 Education (2017).
- 537 19. C. H. Tan et al., "Mapping cerebral pulse pressure and arterial compliance over the adult  
538 lifespan with optical imaging," *PLoS One* **12**(2), e0171305 (2017).

- 539 20. L. He et al., "Noninvasive continuous optical monitoring of absolute cerebral blood flow  
540 in critically ill adults," *Neurophotonics* **5**(4), 045006 (2018).
- 541 21. H. Dehghani et al., "Near infrared optical tomography using NIRFAST: Algorithm for  
542 numerical model and image reconstruction," *Communications in numerical methods in  
543 engineering* **25**(6), 711-732 (2008).
- 544 22. K. E. Mathewson et al., "Dynamics of Alpha Control: Preparatory Suppression of Posterior  
545 Alpha Oscillations by Frontal Modulators Revealed with Combined EEG and Event-  
546 related Optical Signal," *Journal of cognitive neuroscience* **26**(10), 2400-2415 (2014).
- 547 23. C. S. Robertson et al., "Clinical evaluation of a portable near-infrared device for detection  
548 of traumatic intracranial hematomas," *Journal of neurotrauma* **27**(9), 1597-1604 (2010).
- 549 24. M. Forcione et al., "Tomographic Task-Related Functional Near-Infrared Spectroscopy in  
550 Acute Sport-Related Concussion: An Observational Case Study," *Int J Mol Sci* **21**(17),  
551 (2020).
- 552 25. F. P. Tiecks et al., "Effects of the valsalva maneuver on cerebral circulation in healthy  
553 adults. A transcranial Doppler Study," *Stroke* **26**(8), 1386-1392 (1995).
- 554 26. F. Pott et al., "Middle cerebral artery blood velocity during a valsalva maneuver in the  
555 standing position," *Journal of applied physiology (Bethesda, Md. : 1985)* **88**(5), 1545-1550  
556 (2000).
- 557 27. B. G. Perry et al., "Cerebral hemodynamics during graded Valsalva maneuvers," *Frontiers  
558 in physiology* **5**(349) (2014).
- 559 28. M. H. Wilson, "Monro-Kellie 2.0: The dynamic vascular and venous pathophysiological  
560 components of intracranial pressure," *J Cereb Blood Flow Metab* **36**(8), 1338-1350 (2016).
- 561 29. H. Prabhakar et al., "Intracranial pressure changes during Valsalva manoeuvre in patients  
562 undergoing a neuroendoscopic procedure," *Minim Invasive Neurosurg* **50**(2), 98-101  
563 (2007).
- 564 30. M. J. Haykowsky et al., "Resistance exercise, the Valsalva maneuver, and cerebrovascular  
565 transmural pressure," *Med Sci Sports Exerc* **35**(1), 65-68 (2003).
- 566 31. J. C. Greenfield, Jr., J. C. Rembert, and G. T. Tindall, "Transient changes in cerebral  
567 vascular resistance during the Valsalva maneuver in man," *Stroke* **15**(1), 76-79 (1984).
- 568 32. D. Davies et al., "Comparison of near infrared spectroscopy with functional MRI for  
569 detection of physiological changes in the brain independent of superficial tissue," *The  
570 Lancet* **387**(S34) (2016).
- 571 33. B. G. Perry et al., "The cerebrovascular response to graded Valsalva maneuvers while  
572 standing," *Physiol Rep* **2**(2), e00233 (2014).
- 573 34. D. J. Davies et al., "The Valsalva maneuver: an indispensable physiological tool to  
574 differentiate intra versus extracranial near-infrared signal," *Biomed. Opt. Express* **11**(4),  
575 1712-1724 (2020).
- 576 35. J. Steinbrink et al., "Determining changes in NIR absorption using a layered model of the  
577 human head," *Physics in Medicine and Biology* **46**(3), 879-896 (2001).
- 578 36. D. J. Davies, "Cerebral near infra-red spectroscopy in traumatic brain injury as a potential  
579 independent monitoring modality and alternative to invasive tissue oxygen tension  
580 sensors," in *School of Clinical and Experimental Medicine University of Birmingham,*  
581 *University of Birmingham UBIRA E THESIS* (2017).
- 582 37. K. J. Lee et al., "Non-invasive detection of intracranial hypertension using a simplified  
583 intracranial hemo- and hydro-dynamics model," *BioMedical Engineering OnLine* **14**(1),  
584 51 (2015).

- 585 38. S. R. Mousavi et al., "Measurement of in vivo cerebral volumetric strain induced by the  
586 Valsalva maneuver," *J Biomech* **47**(7), 1652-1657 (2014).
- 587 39. B. B. Ertl-Wagner et al., "Demonstration of periventricular brain motion during a Valsalva  
588 maneuver: description of technique, evaluation in healthy volunteers and first results in  
589 hydrocephalic patients," *European Radiology* **11**(10), 1998-2003 (2001).
- 590 40. A. M. Chiarelli et al., "A kurtosis-based wavelet algorithm for motion artifact correction  
591 of fNIRS data," *NeuroImage* **112**(128-137) (2015).
- 592 41. D. Perpetuini et al., "A Motion Artifact Correction Procedure for fNIRS Signals Based on  
593 Wavelet Transform and Infrared Thermography Video Tracking," *Sensors* **21**(15), 5117  
594 (2021).
- 595 42. A. Ishimaru, "Diffusion of light in turbid material," *Appl. Opt.* **28**(12), 2210-2215 (1989).
- 596 43. K. D. Paulsen, and H. Jiang, "Spatially varying optical property reconstruction using a  
597 finite element diffusion equation approximation," *Medical physics* **22**(6), 691-701 (1995).
- 598 44. A. T. Eggebrecht et al., "Mapping distributed brain function and networks with diffuse  
599 optical tomography," *Nat Photonics* **8**(6), 448-454 (2014).
- 600 45. F. Qianqian, and D. A. Boas, "Tetrahedral mesh generation from volumetric binary and  
601 grayscale images," *2009 IEEE International Symposium on Biomedical Imaging: From  
602 Nano to Macro* 1142-1145 (2009).
- 603 46. K. J. Friston et al., "Statistical parametric maps in functional imaging: A general linear  
604 approach," *Human Brain Mapping* **2**(4), 189-210 (1994).
- 605 47. W. Penny et al., *Statistical Parametric Mapping: The Analysis of Functional Brain Images*,  
606 Elsevier: Amsterdam, The Netherlands (2011).
- 607 48. F. Tian, and H. Liu, "Depth-compensated diffuse optical tomography enhanced by general  
608 linear model analysis and an anatomical atlas of human head," *NeuroImage* **85 Pt 1**(166-  
609 180) (2014).
- 610 49. W. G. Zijlstra, A. Buursma, and W. P. Meeuwse-van der Roest, "Absorption spectra of  
611 human fetal and adult oxyhemoglobin, de-oxyhemoglobin, carboxyhemoglobin, and  
612 methemoglobin," *Clin Chem* **37**(9), 1633-1638 (1991).
- 613 50. A. Bluestone et al., "Three-dimensional optical tomography of hemodynamics in the  
614 human head," *Opt Express* **9**(6), 272-286 (2001).
- 615 51. A. M. Chiarelli et al., "Combining energy and Laplacian regularization to accurately  
616 retrieve the depth of brain activity of diffuse optical tomographic data," *Journal of  
617 biomedical optics* **21**(3), 36008 (2016).
- 618 52. M. Clancy et al., "Comparison of Neurological NIRS signals during standing Valsalva  
619 maneuvers, pre and post vasopressor injection," in *Diffuse Optical Imaging V H. Dehghani,*  
620 *and P. Taroni, Eds., Spie-Int Soc Optical Engineering, Bellingham* (2015).
- 621 53. D. Canova et al., "Inconsistent detection of changes in cerebral blood volume by near  
622 infrared spectroscopy in standard clinical tests," *Journal of applied physiology (Bethesda,*  
623 *Md. : 1985)* **110**(6), 1646-1655 (2011).
- 624 54. R. Saager, and A. Berger, "Measurement of layer-like hemodynamic trends in scalp and  
625 cortex: implications for physiological baseline suppression in functional near-infrared  
626 spectroscopy," *Journal of biomedical optics* **13**(3), 034017 (2008).
- 627 55. N. Eleveld et al., "The Influence of Extracerebral Tissue on Continuous Wave Near-  
628 Infrared Spectroscopy in Adults: A Systematic Review of In Vivo Studies," *J Clin Med*  
629 **12**(8), (2023).

- 630 56. M. Forcione, "Neuromonitoring in mild, moderate, and severe acute brain trauma using  
631 non-invasive diffuse optics," in *College of Medical and Dental Sciences*, p. 230, University  
632 of Birmingham (2021).
- 633 57. D. A. Boas, and A. M. Dale, "Simulation study of magnetic resonance imaging-guided  
634 cortically constrained diffuse optical tomography of human brain function," *Appl Opt*  
635 **44**(10), 1957-1968 (2005).
- 636 58. D. A. Boas, A. M. Dale, and M. A. Franceschini, "Diffuse optical imaging of brain  
637 activation: approaches to optimizing image sensitivity, resolution, and accuracy,"  
638 *NeuroImage* **23 Suppl 1**(S275-288 (2004).
- 639 59. M. Clancy et al., "Monitoring the Injured Brain - Registered, patient specific atlas models  
640 to improve accuracy of recovered brain saturation values," in *Diffuse Optical Imaging V*  
641 H. Dehghani, and P. Taroni, Eds., Spie-Int Soc Optical Engineering, Bellingham (2015).
- 642 60. M. Clancy et al., "Improving the quantitative accuracy of cerebral oxygen saturation in  
643 monitoring the injured brain using atlas based Near Infrared Spectroscopy models,"  
644 *Journal of Biophotonics* **9**(8), 812-826 (2016).
- 645 61. M. Clancy, "Application and development of high-density functional near infrared  
646 spectroscopy for traumatic brain injury," in *School of Chemistry*, University of  
647 Birmingham, University of Birmingham UBIRA E THESES (2017).
- 648 62. L. Gagnon et al., "Short separation channel location impacts the performance of short  
649 channel regression in NIRS," *NeuroImage* **59**(3), 2518-2528 (2012).
- 650 63. F. Scholkmann et al., "Absolute Values of Optical Properties (mu<sub>a</sub>, mu<sub>s</sub>, mu<sub>eff</sub> and DPF)  
651 of Human Head Tissue: Dependence on Head Region and Individual," *Adv Exp Med Biol*  
652 **1072**(325-330 (2018).
- 653 64. J. P. Coles et al., "Effect of hyperventilation on cerebral blood flow in traumatic head  
654 injury: clinical relevance and monitoring correlates," *Crit Care Med* **30**(9), 1950-1959  
655 (2002).
- 656 65. W. B. Baker et al., "Continuous non-invasive optical monitoring of cerebral blood flow  
657 and oxidative metabolism after acute brain injury," *Journal of Cerebral Blood Flow &*  
658 *Metabolism* **39**(8), 1469-1485 (2019).
- 659 66. G. A. Perkins, A. T. Eggebrecht, and H. Dehghani, "Quantitative evaluation of frequency  
660 domain measurements in high density diffuse optical tomography," *Journal of biomedical*  
661 *optics* **26**(5), (2021).
- 662 67. G. A. Perkins, A. Eggebrecht, and H. Dehghani, "Multi-Modulated frequency domain high  
663 densitydiffuse optical tomography," *Biomed. Opt. Express* **13**((2022).

## 664 **10 Author Biographies and Photographs**

665 **Mario Forcione** is a specialty registrar in the University of Milan-Bicocca in Anaesthesia and  
666 Intensive Care and has an honorary contract with the University Hospital Birmingham NHS  
667 Foundation Trust. In 2022, he received his Ph.D. from the University of Birmingham in clinical  
668 applications of diffuse optics to brain trauma. In 2015, he received his BS in Medicine from La

669 Sapienza, University of Rome. His work relates to the application of diffuse optics to the care of  
670 mild, moderate, and severe traumatic brain injury patients.

671  
672 **Antonio Maria Chiarelli** is an Associate Professor in Applied Physics at the University of Chieti-  
673 Pescara. He received his BS and MS in Physics Engineering at the Polytechnic of Milan and his  
674 PhD in Neuroimaging at the University of Chieti. He worked as a Post Doctoral researcher at  
675 Beckman Institute, IL, USA. His research focuses on neuroimaging with Magnetic Resonance  
676 Imaging and Diffuse Optics for studying the human brain function and physiology.

677  
678 **David Perpetuini** is an Assistant Professor in Biomedical Engineering at the University of Chieti-  
679 Pescara. He graduated in Biomedical Engineering from the Marche Polytechnic University of  
680 Ancona and he obtained his PhD in Neuroimaging at the University of Chieti. His research mainly  
681 concerns the study of brain and autonomic nervous system activity through functional near-  
682 infrared spectroscopy (fNIRS) and thermal imaging.

683  
684 **Guy Perkins** completed his BSc in Physics in 2018 and then his PhD in 2024, both at the  
685 University of Birmingham. During his PhD, he investigated the development of FD-fNIRS and  
686 DOT for clinical applications. He is now a post-doctoral research fellow at the University of  
687 Padova, investigating preterm infants' brain health in response to hyper/hypo glycemia.

688  
689 **Andrew Stevens** is a Specialist Registrar in Neurosurgery, and academic researcher at the  
690 University of Birmingham in the fields of traumatic brain and spinal cord injury. He graduated  
691 from the University of Birmingham in 2016 with a Bachelors in Medicine and Surgery (MBChB),

692 following completion of a BMedSc in 2013. He is currently completing a PhD in neurotrauma

693 alongside his clinical practice.

694

695 Biographies and photographs for the other authors are not available.
